# Supplementary material
Source: publisher site journal article supplement (https://www.dovepress.com/article/465031)
Supplement: Supplementary file 1 [file get_supplementary_file.php]

Supplementary table1. Comparative analysis of clinical data of patients with or without prostate metastasis within two years

| Variables | Training cohort | | | P-value | Internal validation cohort | | | P-value |
| --- | --- | --- | --- | --- | --- | --- | --- | --- |
| Overall(N=200) | Yes(N=34) | No(N=166) | Overall(N=86) | Yes(N=14) | No(N=72) |
| Age (%),year |  |  |  |  |  |  |  |  |
| ≤72 | 94 (47.0) | 21 (61.8) | 73 (44.0) | 0.088 | 49 (57.0) | 4 (28.6) | 45 (62.5) | 0.04 |
| ＞72 | 106 (53.0) | 13 (38.2) | 93 (56.0) |  | 37 (43.0) | 10 (71.4) | 27 (37.5) |  |
| PSA (%),ng/mL |  |  |  |  |  |  |  |  |
| ≤149.45 | 107 (53.5) | 17 (50.0) | 90 (54.2) | 0.795 | 42 (48.8) | 7 (50.0) | 35 (48.6) | 1 |
| ＞149.45 | 93 (46.5) | 17 (50.0) | 76 (45.8) |  | 44 (51.2) | 7 (50.0) | 37 (51.4) |  |
| LimPSA (%),ng/mL |  |  |  |  |  |  |  |  |
| ≤0.715 | 126 (63.0) | 7 (20.6) | 119 (71.7) | <0.001 | 66 (76.7) | 5 (35.7) | 61 (84.7) | <0.001 |
| ＞0.715 | 74 (37.0) | 27 (79.4) | 47 (28.3) |  | 20 (23.3) | 9 (64.3) | 11 (15.3) |  |
| timePSA (%),d |  |  |  |  |  |  |  |  |
| ≤6.25 | 79 (39.5) | 29 (85.3) | 50 (30.1) | <0.001 | 24 (27.9) | 9 (64.3) | 15 (20.8) | 0.003 |
| ＞6.25 | 121 (60.5) | 5 (14.7) | 116 (69.9) |  | 62 (72.1) | 5 (35.7) | 57 (79.2) |  |
| BM (%) |  |  |  |  |  |  |  |  |
| ≤4 | 132 (66.0) | 12 (35.3) | 120 (72.3) | <0.001 | 58 (67.4) | 2 (14.3) | 56 (77.8) | <0.001 |
| ＞4 | 68 (34.0) | 22 (64.7) | 46 (27.7) |  | 28 (32.6) | 12 (85.7) | 16 (22.2) |  |
| Gleason (%),score |  |  |  |  |  |  |  |  |
| ≤9 | 133 (66.5) | 13 (38.2) | 120 (72.3) | <0.001 | 54 (62.8) | 3 (21.4) | 51 (70.8) | 0.001 |
| ＞9 | 67 (33.5) | 21 (61.8) | 46 (27.7) |  | 32 (37.2) | 11 (78.6) | 21 (29.2) |  |
| Hb (%),g/L |  |  |  |  |  |  |  |  |
| ≤128 | 95 (47.5) | 13 (38.2) | 82 (49.4) | 0.318 | 47 (54.7) | 7 (50.0) | 40 (55.6) | 0.929 |
| ＞128 | 105 (52.5) | 21 (61.8) | 84 (50.6) |  | 39 (45.3) | 7 (50.0) | 32 (44.4) |  |
| Alb (%),g/L |  |  |  |  |  |  |  |  |
| ≤39.4 | 77 (38.5) | 13 (38.2) | 64 (38.6) | 1 | 32 (37.2) | 5 (35.7) | 27 (37.5) | 1 |
| ＞39.4 | 123 (61.5) | 21 (61.8) | 102 (61.4) |  | 54 (62.8) | 9 (64.3) | 45 (62.5) |  |
| ALP (%),U/L |  |  |  |  |  |  |  |  |
| ≤136 | 118 (59.0) | 9 (26.5) | 109 (65.7) | <0.001 | 62 (72.1) | 6 (42.9) | 56 (77.8) | 0.019 |
| ＞136 | 82 (41.0) | 25 (73.5) | 57 (34.3) |  | 24 (27.9) | 8 (57.1) | 16 (22.2) |  |
| LDH (%),U/L |  |  |  |  |  |  |  |  |
| ≤199.6 | 101 (50.5) | 14 (41.2) | 87 (52.4) | 0.315 | 46 (53.5) | 9 (64.3) | 37 (51.4) | 0.554 |
| ＞199.6 | 99 (49.5) | 20 (58.8) | 79 (47.6) |  | 40 (46.5) | 5 (35.7) | 35 (48.6) |  |
| UA (%),μmol/L |  |  |  |  |  |  |  |  |
| ≤338.6 | 94 (47.0) | 19 (55.9) | 75 (45.2) | 0.342 | 39 (45.3) | 5 (35.7) | 34 (47.2) | 0.618 |
| ＞338.6 | 106 (53.0) | 15 (44.1) | 91 (54.8) |  | 47 (54.7) | 9 (64.3) | 38 (52.8) |  |
| CysC (%),mg/L |  |  |  |  |  |  |  |  |
| ≤1.02 | 92 (46.0) | 15 (44.1) | 77 (46.4) | 0.958 | 45 (52.3) | 11 (78.6) | 34 (47.2) | 0.063 |
| ＞1.02 | 108 (54.0) | 19 (55.9) | 89 (53.6) |  | 41 (47.7) | 3 (21.4) | 38 (52.8) |  |
| LimTESTO (%),nmol/L |  |  |  |  |  |  |  |  |
| ≤0.1 | 106 (53.0) | 17 (50.0) | 89 (53.6) | 0.845 | 46 (53.5) | 5 (35.7) | 41 (56.9) | 0.244 |
| ＞0.1 | 94 (47.0) | 17 (50.0) | 77 (46.4) |  | 40 (46.5) | 9 (64.3) | 31 (43.1) |  |
| timeTESTO (%),d |  |  |  |  |  |  |  |  |
| ≤11 | 101 (50.5) | 15 (44.1) | 86 (51.8) | 0.53 | 44 (51.2) | 7 (50.0) | 37 (51.4) | 1 |
| ＞11 | 99 (49.5) | 19 (55.9) | 80 (48.2) |  | 42 (48.8) | 7 (50.0) | 35 (48.6) |  |
| Diabetes (%) |  |  |  |  |  |  |  |  |
| Yes | 107 (53.5) | 20 (58.8) | 87 (52.4) | 0.621 | 35 (40.7) | 5 (35.7) | 30 (41.7) | 0.906 |
| No | 93 (46.5) | 14 (41.2) | 79 (47.6) |  | 51 (59.3) | 9 (64.3) | 42 (58.3) |  |
| Metformin (%) |  |  |  |  |  |  |  |  |
| Yes | 93 (46.5) | 12 (35.3) | 81 (48.8) | 0.212 | 51 (59.3) | 8 (57.1) | 43 (59.7) | 1 |
| No | 107 (53.5) | 22 (64.7) | 85 (51.2) |  | 35 (40.7) | 6 (42.9) | 29 (40.3) |  |

Abbreviation: PSA: prostate specific antigen; LimPSA: the lowest value of PSA; timePSA: the time when PSA dropped to its lowest value; BM: bone metastases; Hb: hemoglobin; Alb: albumin; ALP: alkaline phosphatase; LDH: lactate dehydrogenase; UA: uric acid; CysC: Cystatin C; LimTESTO: the lowest value of testosterone; timeTESTO: the time when testosterone dropped to its lowest value.


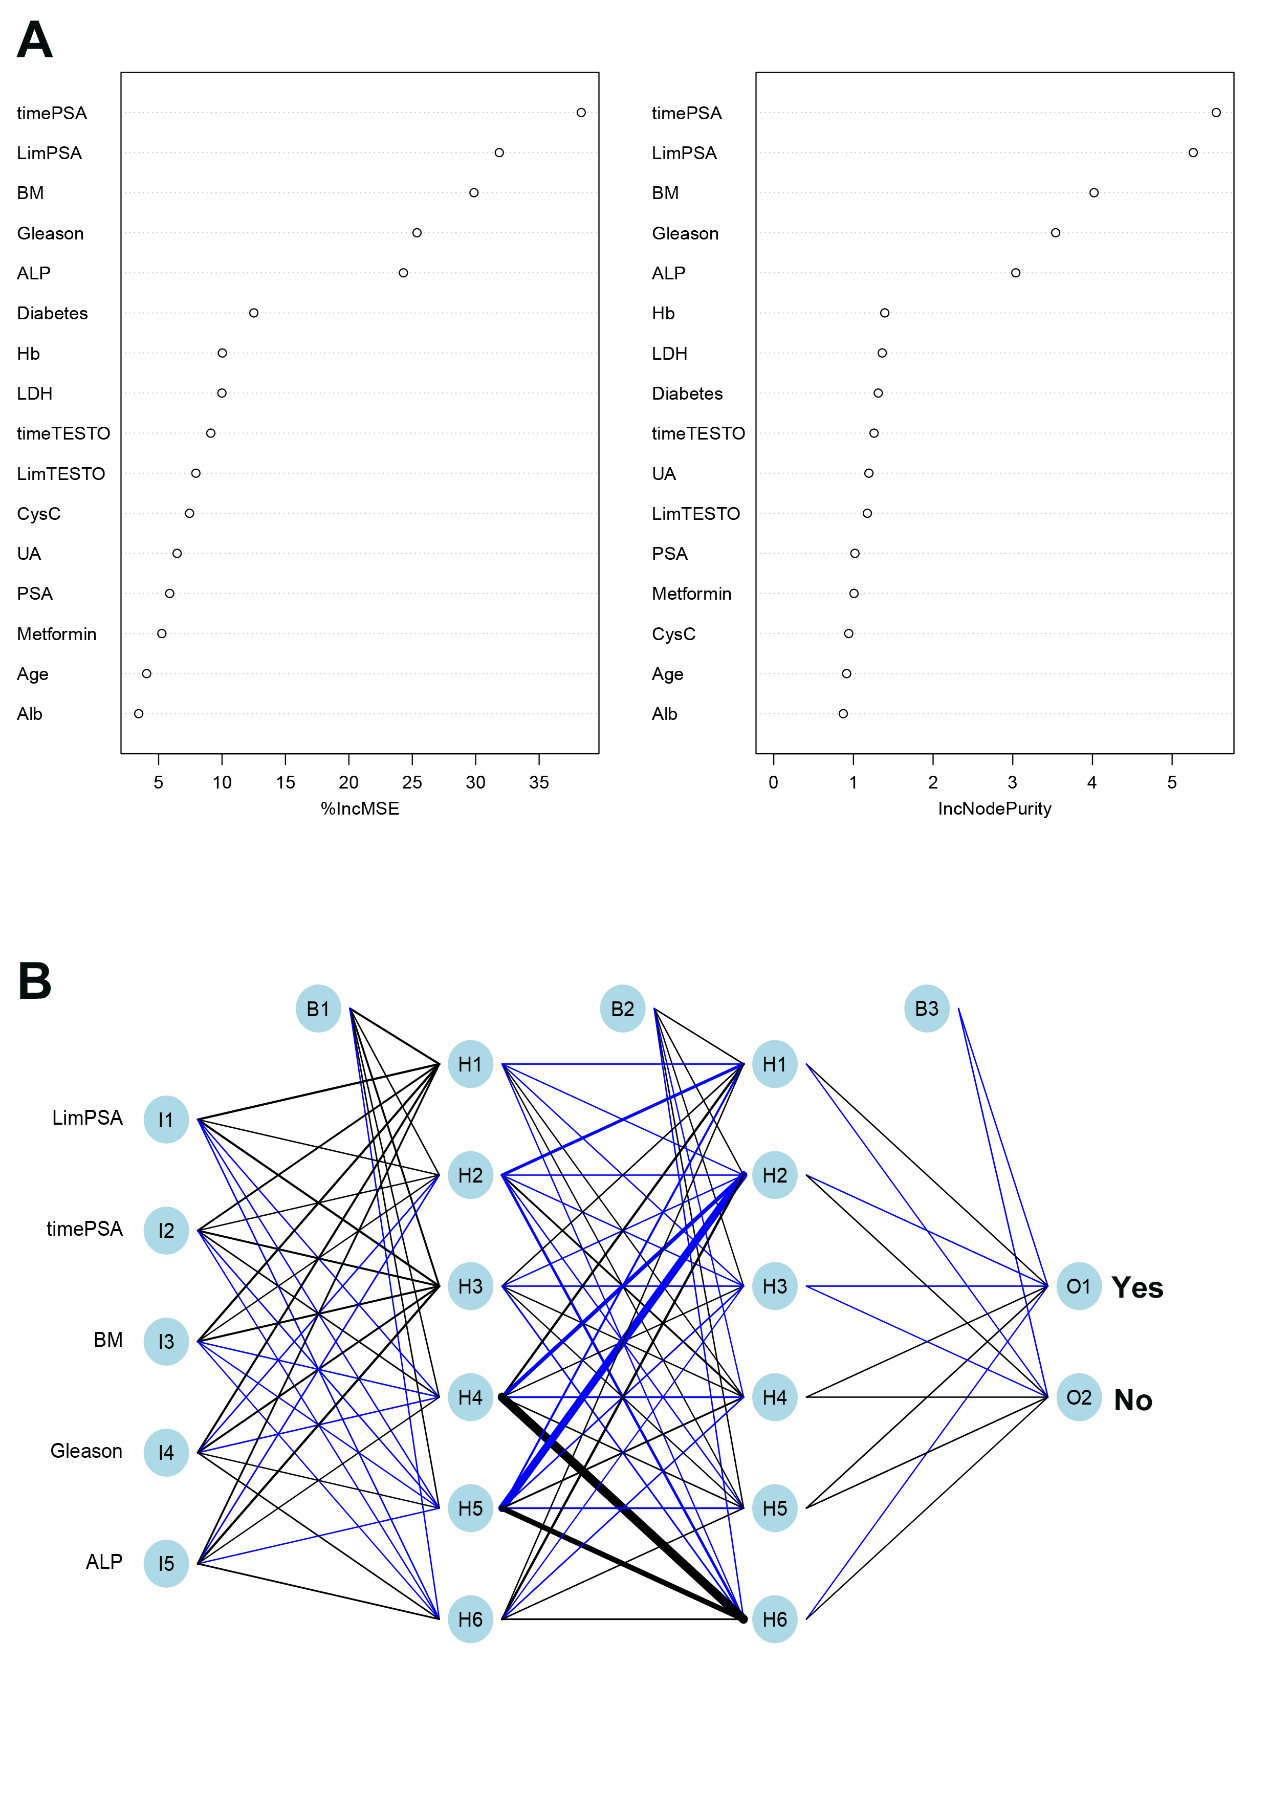


Supplementary Figure1. Visual prediction model for random forest (A) and neural network (B) based on machine learning algorithms.

Notes. The weight distribution of each candidate variable in the random forest prediction model shown in FigureA, where the farther the dot is from the left vertical axis, the greater the weight value of the candidate variable, and vice versa. The iterative distribution of each candidate variable shown in FigureB in the neural network algorithm is predicted based on the final output of the hidden layer iteration.
